# Supplementary material for: A Two-Step Feature Selection Radiomic Approach to Predict Molecular Outcomes in Breast Cancer
Source: MDPI journal article supplement (doi:10.3390/s23031552), 2023-01-31
Supplement: s1 [file s1]

**Table S1.**

Results of the first and second feature selection steps (first two sub-tables), and of the final classification (last sub-table) for the ER+/ER- classification task.

| Positive/Negative ER marker. Number of patients=80 (P=62.5%,N=37.5%). |                |            |                             |                      |                                   |                                   |
|-----------------------------------------------------------------------|----------------|------------|-----------------------------|----------------------|-----------------------------------|-----------------------------------|
| First feature selection step                                          |                |            |                             |                      |                                   |                                   |
| Feature type                                                          | Image modality | Algorithm  | Feature selection algorithm | Feature threshold t1 | accuracy $\pm$ variance           | f1score $\pm$ variance            |
| radiomics from single modalities                                      | ADC            | svm        | no_alg                      | all                  | 0.56 $\pm$ 0.02                   | 0.53 $\pm$ 0.03                   |
|                                                                       |                | mlp        | fisher                      | 45                   | 0.61 $\pm$ 0.03                   | 0.58 $\pm$ 0.02                   |
|                                                                       |                | rf         | fisher                      | 45                   | 0.6 $\pm$ 0.03                    | 0.56 $\pm$ 0.03                   |
|                                                                       | PC             | dt         | no_alg                      | all                  | 0.64 $\pm$ 0.01                   | 0.6 $\pm$ 0.01                    |
|                                                                       |                | dt         | reliefF                     | 20                   | 0.65 $\pm$ 0.03                   | 0.62 $\pm$ 0.04                   |
|                                                                       |                | svm        | reliefF                     | 5                    | 0.61 $\pm$ 0.02                   | 0.6 $\pm$ 0.02                    |
|                                                                       | SUB            | dt         | no_alg                      | all                  | 0.53 $\pm$ 0.03                   | 0.5 $\pm$ 0.03                    |
|                                                                       |                | mlp        | reliefF                     | 20                   | 0.63 $\pm$ 0.05                   | 0.59 $\pm$ 0.06                   |
|                                                                       |                | knn        | gini_index                  | 5                    | 0.6 $\pm$ 0.02                    | 0.59 $\pm$ 0.02                   |
|                                                                       | T2             | mlp        | no_alg                      | all                  | 0.7 $\pm$ 0.04                    | 0.66 $\pm$ 0.05                   |
|                                                                       |                | <b>mlp</b> | <b>fisher</b>               | <b>45</b>            | <b>0.73 <math>\pm</math> 0.02</b> | <b>0.69 <math>\pm</math> 0.02</b> |
|                                                                       |                | mlp        | fisher                      | 35                   | 0.7 $\pm$ 0.04                    | 0.67 $\pm$ 0.04                   |
| radiomics from single modalities/clinical                             | ADC            | rf         | no_alg                      | all                  | 0.59 $\pm$ 0.03                   | 0.54 $\pm$ 0.03                   |
|                                                                       |                | dt         | gini_index                  | 30                   | 0.6 $\pm$ 0.03                    | 0.58 $\pm$ 0.04                   |
|                                                                       |                | mlp        | chi                         | 50                   | 0.61 $\pm$ 0.03                   | 0.57 $\pm$ 0.03                   |
|                                                                       | PC             | dt         | no_alg                      | all                  | 0.58 $\pm$ 0.02                   | 0.5 $\pm$ 0.03                    |
|                                                                       |                | dt         | chi                         | 50                   | 0.65 $\pm$ 0.03                   | 0.62 $\pm$ 0.04                   |
|                                                                       |                | dt         | reliefF                     | 15                   | 0.66 $\pm$ 0.02                   | 0.62 $\pm$ 0.02                   |
|                                                                       | SUB            | rf         | no_alg                      | all                  | 0.63 $\pm$ 0.01                   | 0.59 $\pm$ 0.01                   |
|                                                                       |                | dt         | reliefF                     | 5                    | 0.66 $\pm$ 0.07                   | 0.65 $\pm$ 0.07                   |
|                                                                       |                | mlp        | chi                         | 25                   | 0.63 $\pm$ 0.05                   | 0.6 $\pm$ 0.05                    |
|                                                                       | T2             | mlp        | no_alg                      | all                  | 0.69 $\pm$ 0.02                   | 0.65 $\pm$ 0.03                   |
|                                                                       |                | <b>mlp</b> | <b>fisher</b>               | <b>25</b>            | <b>0.7 <math>\pm</math> 0.01</b>  | <b>0.68 <math>\pm</math> 0.01</b> |
|                                                                       |                | mlp        | chi                         | 35                   | 0.7 $\pm$ 0.03                    | 0.66 $\pm$ 0.04                   |
| radiomics/clinical                                                    | ALL            | mlp        | no_alg                      | all                  | 0.56 $\pm$ 0.04                   | 0.51 $\pm$ 0.05                   |
|                                                                       |                | <b>mlp</b> | <b>chi</b>                  | <b>50</b>            | <b>0.68 <math>\pm</math> 0.04</b> | <b>0.65 <math>\pm</math> 0.04</b> |
|                                                                       |                | svm        | chi                         | 50                   | 0.61 $\pm$ 0.06                   | 0.61 $\pm$ 0.06                   |
| radiomics                                                             | ALL            | mlp        | no_alg                      | all                  | 0.58 $\pm$ 0.05                   | 0.53 $\pm$ 0.06                   |
|                                                                       |                | <b>mlp</b> | <b>chi</b>                  | <b>25</b>            | <b>0.63 <math>\pm</math> 0.03</b> | <b>0.59 <math>\pm</math> 0.04</b> |
|                                                                       |                | mlp        | reliefF                     | 15                   | 0.63 $\pm$ 0.02                   | 0.59 $\pm$ 0.02                   |

| Second feature selection step               |                |            |                             |                      |                                   |                                   |
|---------------------------------------------|----------------|------------|-----------------------------|----------------------|-----------------------------------|-----------------------------------|
| Feature type                                | Image modality | Algorithm  | Feature selection algorithm | Feature threshold t2 | accuracy $\pm$ variance           | f1score $\pm$ variance            |
| radiomics from single modalities            | T2             | <b>mlp</b> | <b>lr</b>                   | <b>11</b>            | <b>0.74 <math>\pm</math> 0.01</b> | <b>0.72 <math>\pm</math> 0.01</b> |
|                                             |                | mlp        | lr                          | 43                   | 0.74 $\pm$ 0.03                   | 0.71 $\pm$ 0.04                   |
| radiomics from single modalities/clinical * | T2             | mlp        | lr                          | 9                    | 0.73 $\pm$ 0.02                   | 0.68 $\pm$ 0.03                   |

\*only radiomics were selected

| Predictor building with the Leave-One-Out approach |                |            |                             |                |             |             |
|----------------------------------------------------|----------------|------------|-----------------------------|----------------|-------------|-------------|
| Feature type                                       | Image modality | Algorithm  | Feature selection algorithm | Feature number | accuracy    | f1score     |
| radiomics from single modalities                   | T2             | <b>svm</b> | <b>no_alg</b>               | <b>11</b>      | <b>0,81</b> | <b>0,85</b> |
|                                                    |                | mlp        | no_alg                      | 11             | 0,8         | 0,84        |

in **bold** = best result (F1score) for each "Feature type" section

in **red** = best result (F1score) among ALL the "Feature type" sections

**Table S2.**

Results of the first and second feature selection steps (first two sub-tables), and of the final classification (last sub-table) for the HER2+/HER2- classification task.

| Positive/Negative HER2 marker. Number of patients=80 (P=29%,N=71%) |                |            |                             |                      |                                   |                                   |
|--------------------------------------------------------------------|----------------|------------|-----------------------------|----------------------|-----------------------------------|-----------------------------------|
| First feature selection step                                       |                |            |                             |                      |                                   |                                   |
| Feature type                                                       | Image modality | Algorithm  | Feature selection algorithm | Feature threshold t1 | accuracy $\pm$ variance           | f1score $\pm$ variance            |
| radiomics from single modalities                                   | ADC            | dt         | no_alg                      | all                  | 0.64 $\pm$ 0.02                   | 0.56 $\pm$ 0.02                   |
|                                                                    |                | <b>rf</b>  | <b>reliefF</b>              | <b>30</b>            | <b>0.76 <math>\pm</math> 0.01</b> | <b>0.7 <math>\pm</math> 0.03</b>  |
|                                                                    |                | mlp        | gini_index                  | 5                    | 0.71 $\pm$ 0.03                   | 0.65 $\pm$ 0.05                   |
|                                                                    | PC             | nb         | no_alg                      | all                  | 0.66 $\pm$ 0.02                   | 0.52 $\pm$ 0.03                   |
|                                                                    |                | svm        | reliefF                     | 5                    | 0.66 $\pm$ 0.03                   | 0.62 $\pm$ 0.04                   |
|                                                                    |                | mlp        | fisher                      | 15                   | 0.64 $\pm$ 0.04                   | 0.58 $\pm$ 0.06                   |
|                                                                    | SUB            | nb         | no_alg                      | all                  | 0.71 $\pm$ 0.03                   | 0.58 $\pm$ 0.07                   |
|                                                                    |                | knn        | fisher                      | 5                    | 0.7 $\pm$ 0.04                    | 0.67 $\pm$ 0.04                   |
|                                                                    |                | dt         | fisher                      | 15                   | 0.69 $\pm$ 0.02                   | 0.62 $\pm$ 0.03                   |
|                                                                    | T2             | mlp        | no_alg                      | all                  | 0.68 $\pm$ 0.03                   | 0.59 $\pm$ 0.03                   |
|                                                                    |                | dt         | gini_index                  | 40                   | 0.7 $\pm$ 0.01                    | 0.63 $\pm$ 0.01                   |
|                                                                    |                | dt         | reliefF                     | 15                   | 0.71 $\pm$ 0.02                   | 0.63 $\pm$ 0.03                   |
| radiomics from single modalities/clinical                          | ADC            | dt         | no_alg                      | all                  | 0.74 $\pm$ 0.02                   | 0.67 $\pm$ 0.03                   |
|                                                                    |                | <b>nb</b>  | <b>reliefF</b>              | <b>10</b>            | <b>0.73 <math>\pm</math> 0.02</b> | <b>0.69 <math>\pm</math> 0.03</b> |
|                                                                    |                | svm        | reliefF                     | 25                   | 0.75 $\pm$ 0.02                   | 0.67 $\pm$ 0.03                   |
|                                                                    | PC             | nb         | no_alg                      | all                  | 0.68 $\pm$ 0.02                   | 0.54 $\pm$ 0.04                   |
|                                                                    |                | mlp        | gini_index                  | 20                   | 0.66 $\pm$ 0.01                   | 0.56 $\pm$ 0.02                   |
|                                                                    |                | dt         | chi                         | 5                    | 0.66 $\pm$ 0.02                   | 0.55 $\pm$ 0.04                   |
|                                                                    | SUB            | nb         | no_alg                      | all                  | 0.71 $\pm$ 0.03                   | 0.58 $\pm$ 0.07                   |
|                                                                    |                | nb         | reliefF                     | 5                    | 0.64 $\pm$ 0.02                   | 0.62 $\pm$ 0.02                   |
|                                                                    |                | mlp        | chi                         | 30                   | 0.69 $\pm$ 0.03                   | 0.62 $\pm$ 0.04                   |
|                                                                    | T2             | nb         | no_alg                      | all                  | 0.68 $\pm$ 0.04                   | 0.57 $\pm$ 0.05                   |
|                                                                    |                | nb         | fisher                      | 50                   | 0.68 $\pm$ 0.03                   | 0.64 $\pm$ 0.02                   |
|                                                                    |                | dt         | reliefF                     | 50                   | 0.71 $\pm$ 0.02                   | 0.63 $\pm$ 0.03                   |
| radiomics/clinical                                                 | ALL            | nb         | no_alg                      | all                  | 0.7 $\pm$ 0.02                    | 0.59 $\pm$ 0.04                   |
|                                                                    |                | <b>mlp</b> | <b>gini_index</b>           | <b>10</b>            | <b>0.73 <math>\pm</math> 0.02</b> | <b>0.68 <math>\pm</math> 0.02</b> |
|                                                                    |                | dt         | reliefF                     | 50                   | 0.71 $\pm$ 0.02                   | 0.64 $\pm$ 0.02                   |
| radiomics                                                          | ALL            | dt         | no_alg                      | all                  | 0.66 $\pm$ 0.02                   | 0.6 $\pm$ 0.02                    |
|                                                                    |                | <b>rf</b>  | <b>reliefF</b>              | <b>30</b>            | <b>0.7 <math>\pm</math> 0.01</b>  | <b>0.62 <math>\pm</math> 0.02</b> |
|                                                                    |                | knn        | chi                         | 5                    | 0.64 $\pm$ 0.04                   | 0.6 $\pm$ 0.04                    |

| Second feature selection step    |                |           |                             |                      |                                   |                                   |
|----------------------------------|----------------|-----------|-----------------------------|----------------------|-----------------------------------|-----------------------------------|
| Feature type                     | Image modality | Algorithm | Feature selection algorithm | Feature threshold t2 | accuracy $\pm$ variance           | f1score $\pm$ variance            |
| radiomics from single modalities | ADC            | knn       | mi                          | 27                   | <b>0.74 <math>\pm</math> 0.03</b> | <b>0.69 <math>\pm</math> 0.05</b> |
|                                  |                | svm       | mi                          | 42                   | 0.73 $\pm$ 0.03                   | 0.68 $\pm$ 0.04                   |
| <b>radiomics/clinical *</b>      | <b>ALL</b>     | <b>dt</b> | <b>cfs</b>                  | <b>5</b>             | <b>0.8 <math>\pm</math> 0.02</b>  | <b>0.75 <math>\pm</math> 0.04</b> |

\*only radiomics were selected

| Predictor building with the Leave-One-Out approach |                |           |                             |                |            |             |
|----------------------------------------------------|----------------|-----------|-----------------------------|----------------|------------|-------------|
| Feature type                                       | Image modality | Algorithm | Feature selection algorithm | Feature number | accuracy   | f1score     |
| cliniche/radiomiche *                              | ALL            | <b>rf</b> | <b>no_alg</b>               | <b>5</b>       | <b>0,8</b> | <b>0,64</b> |
|                                                    |                | svm       | no_alg                      | 5              | 0,74       | 0,64        |

in **bold** = best result (F1score) for each "Feature type" section

in **red** = best result (F1score) among ALL the "Feature type" sections

**Table S3.**

Results of the first and second feature selection steps (first two sub-tables), and of the final classification (last sub-table) for the KI67+/KI67- classification task.

| Positive/Negative KI67 marker. Number of patients=78 (P=14%,N=86%) |                |           |                             |                      |                     |                    |
|--------------------------------------------------------------------|----------------|-----------|-----------------------------|----------------------|---------------------|--------------------|
| First feature selection step                                       |                |           |                             |                      |                     |                    |
| Feature type                                                       | Image modality | Algorithm | Feature selection algorithm | Feature threshold t1 | accuracy ± variance | f1score ± variance |
| radiomics from single modalities                                   | ADC            | svm       | no_alg                      | all                  | 0.78 ± 0.03         | 0.61 ± 0.06        |
|                                                                    |                | nb        | chi                         | 10                   | 0.86 ± 0.01         | 0.69 ± 0.05        |
|                                                                    |                | rf        | reliefF                     | 45                   | 0.82 ± 0.03         | 0.68 ± 0.06        |
|                                                                    | PC             | svm       | no_alg                      | all                  | 0.9 ± 0.01          | 0.69 ± 0.06        |
|                                                                    |                | svm       | chi                         | 10                   | 0.89 ± 0.01         | 0.77 ± 0.06        |
|                                                                    |                | rf        | fisher                      | 5                    | 0.86 ± 0.02         | 0.77 ± 0.05        |
|                                                                    | SUB            | dt        | no_alg                      | all                  | 0.82 ± 0.01         | 0.64 ± 0.05        |
|                                                                    |                | rf        | fisher                      | 30                   | 0.88 ± 0            | 0.72 ± 0.03        |
|                                                                    |                | dt        | reliefF                     | 50                   | 0.9 ± 0.01          | 0.7 ± 0.07         |
|                                                                    | T2             | svm       | no_alg                      | all                  | 0.76 ± 0.03         | 0.57 ± 0.06        |
|                                                                    |                | nb        | chi                         | 25                   | 0.81 ± 0.02         | 0.67 ± 0.06        |
|                                                                    |                | dt        | reliefF                     | 40                   | 0.85 ± 0.02         | 0.66 ± 0.06        |
| radiomics from single modalities/clinical                          | ADC            | svm       | no_alg                      | all                  | 0.79 ± 0.03         | 0.64 ± 0.07        |
|                                                                    |                | dt        | chi                         | 20                   | 0.81 ± 0.02         | 0.68 ± 0.04        |
|                                                                    |                | nb        | reliefF                     | 15                   | 0.82 ± 0.02         | 0.67 ± 0.06        |
|                                                                    | PC             | svm       | no_alg                      | all                  | 0.87 ± 0.01         | 0.67 ± 0.05        |
|                                                                    |                | mlp       | gini_index                  | 5                    | 0.85 ± 0.02         | 0.75 ± 0.05        |
|                                                                    |                | nb        | fisher                      | 10                   | 0.86 ± 0.02         | 0.74 ± 0.06        |
|                                                                    | SUB            | rf        | no_alg                      | all                  | 0.82 ± 0.02         | 0.63 ± 0.07        |
|                                                                    |                | rf        | fisher                      | 30                   | 0.85 ± 0.01         | 0.69 ± 0.03        |
|                                                                    |                | dt        | fisher                      | 5                    | 0.81 ± 0.01         | 0.68 ± 0.04        |
|                                                                    | T2             | dt        | no_alg                      | all                  | 0.79 ± 0            | 0.59 ± 0.03        |
|                                                                    |                | rf        | chi                         | 5                    | 0.8 ± 0.02          | 0.71 ± 0.05        |
|                                                                    |                | dt        | fisher                      | 30                   | 0.8 ± 0.02          | 0.67 ± 0.05        |
| radiomics/clinical                                                 | ALL            | dt        | no_alg                      | all                  | 0.82 ± 0.01         | 0.57 ± 0.03        |
|                                                                    |                | dt        | chi                         | 50                   | 0.85 ± 0.01         | 0.72 ± 0.03        |
|                                                                    |                | dt        | chi                         | 35                   | 0.86 ± 0.02         | 0.71 ± 0.07        |
| radiomics                                                          | ALL            | dt        | no_alg                      | all                  | 0.77 ± 0.02         | 0.53 ± 0.04        |
|                                                                    |                | dt        | fisher                      | 20                   | 0.87 ± 0.02         | 0.79 ± 0.05        |
|                                                                    |                | dt        | fisher                      | 40                   | 0.85 ± 0.01         | 0.7 ± 0.05         |
|                                                                    |                |           |                             |                      |                     |                    |
| Second feature selection step                                      |                |           |                             |                      |                     |                    |
| Feature type                                                       | Image modality | Algorithm | Feature selection algorithm | Feature threshold t2 | accuracy ± variance | f1score ± variance |
| radiomics                                                          | ALL            | svm       | lr                          | 21                   | 0.84 ± 0.02         | 0.7 ± 0.06         |
|                                                                    |                | mlp       | cfs                         | 7                    | 0.82 ± 0.02         | 0.7 ± 0.06         |
| radiomics from single modalities                                   | PC             | mlp       | cfs                         | 1                    | 0.87 ± 0.02         | 0.79 ± 0.05        |
|                                                                    |                | mlp       | cfs                         | 2                    | 0.86 ± 0.03         | 0.78 ± 0.06        |
|                                                                    |                |           |                             |                      |                     |                    |
| Predictor building with the Leave-One-Out approach                 |                |           |                             |                      |                     |                    |
| Feature type                                                       | Image modality | Algorithm | Feature selection algorithm | Feature number       | accuracy            | f1score            |
| radiomics from single modalities                                   | PC             | knn/svm * | no_alg                      | 1                    | 0,88                | 0,93               |
|                                                                    |                | mlp       | no_alg                      | 1                    | 0,82                | 0,89               |
|                                                                    |                | svm *     | no_alg                      | 2                    | 0,88                | 0,93               |
|                                                                    |                | mlp       | no_alg                      | 2                    | 0,85                | 0,9                |

\* predicts only a single class

in **bold** = best result (F1score) for each "Feature type" section

in **red** = best result (F1score) among ALL the "Feature type" sections

**Table S4.**

Results of the first and second feature selection steps (first two sub-tables), and of the final classification (last sub-table) for the PR+/PR- classification task.

| Positive/Negative PR marker. Number of patients=80 (P=50%,N=50%) |                |            |                             |                      |                                   |                                   |
|------------------------------------------------------------------|----------------|------------|-----------------------------|----------------------|-----------------------------------|-----------------------------------|
| First feature selection step                                     |                |            |                             |                      |                                   |                                   |
| Feature type                                                     | Image modality | Algorithm  | Feature selection algorithm | Feature threshold t1 | accuracy $\pm$ variance           | f1score $\pm$ variance            |
| radiomics from single modalities                                 | ADC            | svm        | no_alg                      | all                  | 0.6 $\pm$ 0.03                    | 0.59 $\pm$ 0.03                   |
|                                                                  |                | mlp        | fisher                      | 25                   | 0.65 $\pm$ 0.02                   | 0.64 $\pm$ 0.02                   |
|                                                                  |                | svm        | fisher                      | 30                   | 0.64 $\pm$ 0.03                   | 0.62 $\pm$ 0.03                   |
|                                                                  | PC             | nb         | no_alg                      | all                  | 0.61 $\pm$ 0.04                   | 0.59 $\pm$ 0.05                   |
|                                                                  |                | <b>knn</b> | <b>fisher</b>               | <b>5</b>             | <b>0.74 <math>\pm</math> 0.03</b> | <b>0.73 <math>\pm</math> 0.03</b> |
|                                                                  |                | knn        | fisher                      | 25                   | 0.7 $\pm$ 0.03                    | 0.67 $\pm$ 0.04                   |
|                                                                  | SUB            | mlp        | no_alg                      | all                  | 0.54 $\pm$ 0.05                   | 0.53 $\pm$ 0.06                   |
|                                                                  |                | knn        | fisher                      | 5                    | 0.63 $\pm$ 0.04                   | 0.61 $\pm$ 0.05                   |
|                                                                  |                | svm        | fisher                      | 15                   | 0.61 $\pm$ 0.04                   | 0.6 $\pm$ 0.04                    |
|                                                                  | T2             | mlp        | no_alg                      | all                  | 0.56 $\pm$ 0.02                   | 0.55 $\pm$ 0.02                   |
|                                                                  |                | mlp        | fisher                      | 50                   | 0.7 $\pm$ 0.02                    | 0.68 $\pm$ 0.03                   |
|                                                                  |                | mlp        | gini_index                  | 35                   | 0.69 $\pm$ 0.03                   | 0.67 $\pm$ 0.04                   |
| radiomics from single modalities/clinical                        | ADC            | svm        | no_alg                      | all                  | 0.61 $\pm$ 0.04                   | 0.6 $\pm$ 0.04                    |
|                                                                  |                | mlp        | fisher                      | 25                   | 0.65 $\pm$ 0.02                   | 0.64 $\pm$ 0.02                   |
|                                                                  |                | svm        | fisher                      | 30                   | 0.64 $\pm$ 0.03                   | 0.62 $\pm$ 0.03                   |
|                                                                  | PC             | nb         | no_alg                      | all                  | 0.61 $\pm$ 0.04                   | 0.59 $\pm$ 0.05                   |
|                                                                  |                | <b>knn</b> | <b>fisher</b>               | <b>5</b>             | <b>0.74 <math>\pm</math> 0.03</b> | <b>0.73 <math>\pm</math> 0.03</b> |
|                                                                  |                | dt         | chi                         | 5                    | 0.66 $\pm$ 0.01                   | 0.65 $\pm$ 0.01                   |
|                                                                  | SUB            | mlp        | no_alg                      | all                  | 0.5 $\pm$ 0.05                    | 0.49 $\pm$ 0.05                   |
|                                                                  |                | knn        | fisher                      | 5                    | 0.63 $\pm$ 0.04                   | 0.61 $\pm$ 0.05                   |
|                                                                  |                | mlp        | reliefF                     | 5                    | 0.61 $\pm$ 0.03                   | 0.6 $\pm$ 0.03                    |
|                                                                  | T2             | mlp        | no_alg                      | all                  | 0.56 $\pm$ 0.02                   | 0.54 $\pm$ 0.02                   |
|                                                                  |                | mlp        | fisher                      | 50                   | 0.7 $\pm$ 0.02                    | 0.68 $\pm$ 0.03                   |
|                                                                  |                | mlp        | gini_index                  | 25                   | 0.66 $\pm$ 0.03                   | 0.65 $\pm$ 0.03                   |
| radiomics/clinical                                               | ALL            | mlp        | no_alg                      | all                  | 0.64 $\pm$ 0.02                   | 0.62 $\pm$ 0.03                   |
|                                                                  |                | <b>mlp</b> | <b>reliefF</b>              | <b>15</b>            | <b>0.69 <math>\pm</math> 0.06</b> | <b>0.67 <math>\pm</math> 0.07</b> |
|                                                                  |                | mlp        | fisher                      | 50                   | 0.64 $\pm$ 0.04                   | 0.61 $\pm$ 0.05                   |
| radiomics                                                        | ALL            | nb         | no_alg                      | all                  | 0.59 $\pm$ 0.02                   | 0.53 $\pm$ 0.04                   |
|                                                                  |                | <b>mlp</b> | <b>reliefF</b>              | <b>15</b>            | <b>0.69 <math>\pm</math> 0.06</b> | <b>0.67 <math>\pm</math> 0.07</b> |
|                                                                  |                | mlp        | fisher                      | 50                   | 0.64 $\pm$ 0.04                   | 0.61 $\pm$ 0.05                   |

| Second feature selection step    |                |            |                             |                      |                                   |                                   |
|----------------------------------|----------------|------------|-----------------------------|----------------------|-----------------------------------|-----------------------------------|
| Feature type                     | Image modality | Algorithm  | Feature selection algorithm | Feature threshold t2 | accuracy $\pm$ variance           | f1score $\pm$ variance            |
| radiomics from single modalities | PC             | <b>knn</b> | <b>lr</b>                   | <b>3</b>             | <b>0.75 <math>\pm</math> 0.02</b> | <b>0.74 <math>\pm</math> 0.03</b> |
|                                  |                | nb         | cfs                         | 6                    | 0.73 $\pm$ 0.04                   | 0.71 $\pm$ 0.04                   |
| radiomics                        | ALL            | <b>rf</b>  | <b>lr</b>                   | <b>9</b>             | <b>0.75 <math>\pm</math> 0.02</b> | <b>0.73 <math>\pm</math> 0.02</b> |

| Predictor building with the Leave-One-Out approach |                |             |                             |                |             |             |
|----------------------------------------------------|----------------|-------------|-----------------------------|----------------|-------------|-------------|
| Feature type                                       | Image modality | Algorithm   | Feature selection algorithm | Feature number | accuracy    | f1score     |
| radiomics from single modalities                   | PC             | <b>mlp*</b> | <b>no_alg</b>               | <b>3</b>       | <b>0,73</b> | <b>0,73</b> |
|                                                    |                | knn         | no_alg                      | 3              | 0,74        | 0,72        |
|                                                    |                | <b>nb</b>   | <b>no_alg</b>               | <b>6</b>       | <b>0,73</b> | <b>0,74</b> |
|                                                    |                | rf          | no_alg                      | 6              | 0,68        | 0,68        |

\*the method with the lowest feature number was selected as the best  
in **bold** = best result (F1score) for each "Feature type" section  
in **red** = best result (F1score) among ALL the "Feature type" sections

**Table S5.** Retrospective studies on predicting BC molecular subtypes. MORPH = morphology, IS = intensity-based statistics, LoG = Laplacian of Gaussian, WL = wavelet, ICCs = intra and inter correlations, PCCs = Pearson correlation coefficients, ANOVA = analysis of variance, mRMR = maximum relevance–minimum redundancy.

| <i>First Author<br/>Year</i>                  | <i>#<br/>Patients</i> | <i>MRI<br/>Modality</i>                    | <i>Magnetic<br/>Field</i> | <i>Radiomic Feature<br/>Family</i>                               | <i>Feature Selection<br/>Algorithm</i>               | <i>Validation on<br/>external dataset</i> | <i>Aim</i>                                                                                                                                  | <i>Outcomes</i>                                                                                                                                                                                     |
|-----------------------------------------------|-----------------------|--------------------------------------------|---------------------------|------------------------------------------------------------------|------------------------------------------------------|-------------------------------------------|---------------------------------------------------------------------------------------------------------------------------------------------|-----------------------------------------------------------------------------------------------------------------------------------------------------------------------------------------------------|
| <i>Huang et al<sup>48</sup><br/>(2021)</i>    | 162                   | DCE T1,<br>T2w fat sat,<br>ADC maps        | 3 T                       | MORPH, IS, GLCM,<br>GLSZM, GLRLM,<br>NGTDM, NGLDM,<br>LoG and WL | ICCs, LASSO-RFE,<br>mRMR, Boruta<br>method and PCCs. | No                                        | To predict molecular<br>subtypes (ER, PR, HER2)<br>and androgen receptor<br>(AR) expression.                                                | The MLP classifiers showed<br>the best diagnostic<br>performance in three<br>molecular subtype<br>classification tasks and in<br>discriminating AR<br>expression (AUC =0.907;<br>accuracy = 85.8%). |
| <i>Kayadibi et al<sup>50</sup><br/>(2022)</i> | 154                   | DCE T1w<br>fat sat<br>FLASH,<br>ADC maps   | 1.5 T                     | MORPH, IS, GLCM,<br>GLSZM, GLRLM,<br>NGTDM, NGLDM,<br>LoG and WL | ICC, LASSO                                           | No                                        | To investigate the value<br>of MRI-based<br>radioproteomics in<br>predicting Ki67<br>expression levels.                                     | The best model performance<br>was achieved with 15<br>selected features from the<br>ADC sequence based on the<br>Ki67 cut-off value of 14%.                                                         |
| <i>Fan et al<sup>51</sup><br/>(2019)</i>      | 144                   | DCE T1w<br>fat sat,<br>ADC maps            | 3 T                       | MORPH, IS, GLCM                                                  | Multi task feature<br>selection                      | No                                        | To improve prediction<br>accuracy of histological<br>grade and Ki67 status<br>based on tumor radiomic<br>analysis.                          | Multi task learning models<br>improve the prediction of<br>Ki67 status and tumor grade.                                                                                                             |
| <i>Zhong et al<sup>52</sup><br/>(2022)</i>    | 443                   | DCE-MRI,                                   | 3 T                       | IS, GLCM, Gabor and<br>Law                                       | Two-sample t-test,<br>LASSO, Stepwise                | No                                        | To establish and validate<br>the multiregional<br>radiomic signatures for<br>the preoperative<br>identification of the ER<br>and PR status. | Multiregional radiomic<br>signatures achieved the best<br>AUCs for evaluating the ER<br>(0.851 and 0.833) and PR<br>(0.848 and 0.763) status.                                                       |
| <i>Park et al<sup>54</sup><br/>(2018)</i>     | 294                   | DCE T1w,<br>T2w, PC<br>T1w, SUB<br>DCE T1w | 1.5 T                     | MORPH, IH, GLCM,<br>GLSZM                                        | ICC value of Rad-<br>score                           | No                                        | To establish a radiomics<br>nomogram that<br>incorporates the<br>radiomics signature for<br>disease free survival<br>(DFS), MRI and         | Higher Rad-scores were<br>significantly associated with<br>worse DFS in both the<br>training and validation sets<br>(P=0.002 and 0.036,<br>respectively). The radiomics<br>nomogram estimated DFS   |

|                                           |     |                                                                  |           |                                                               |                                                                                    |     |                                                                                                                                                                 |                                                                                                                                                                                                                                                                                    |
|-------------------------------------------|-----|------------------------------------------------------------------|-----------|---------------------------------------------------------------|------------------------------------------------------------------------------------|-----|-----------------------------------------------------------------------------------------------------------------------------------------------------------------|------------------------------------------------------------------------------------------------------------------------------------------------------------------------------------------------------------------------------------------------------------------------------------|
|                                           |     |                                                                  |           |                                                               |                                                                                    |     | clinicopathological findings.                                                                                                                                   | better than the clinicopathological or Rad-score-only nomograms.                                                                                                                                                                                                                   |
| <i>Xie et al</i> <sup>55</sup><br>(2019)  | 134 | T2w, T1w, DCE T1w, DWI                                           | 3 T       | MORPH, IS and texture features                                | ANOVA, CV, t-test, LASSO and ridge regression and elastic net, PCC                 | No  | To classify immunohistochemical subtypes with ML analysis of mpMRI radiomics.                                                                                   | For 4-IHC classification task, the best accuracy of 72.4% was achieved based on linear discriminant analysis. For comparing TN to non-TN cancers, the highest accuracy of 91.0% was obtained with SVM and medium KNN.                                                              |
| <i>Liu et al</i> <sup>56</sup><br>(2019)  | 586 | DCE T1w, T2w, DWI                                                |           | MORPH, IH, texture, Gabor and Law                             | Univariate analysis with the Mann-Whitney U test, PCC, Boruta method               | Yes | To evaluate radiomics of mpMRI for pretreatment prediction of pathologic complete response to neoadjuvant chemotherapy.                                         | Radiomic signature combining multiparametric MRI achieved an AUC of 0.79.                                                                                                                                                                                                          |
| <i>Ni et al</i> <sup>57</sup><br>(2020)   | 112 | DWI, T2w fat sat, T1w, T1w pre contrast fat sat, DCE T1w fat sat | 3 T       | MORPH, IH, texture, GLSZM, GLCM and RLM                       | Remove outlier, PCC, mean center and standard deviation scale and noise processing | No  | To investigate the feasibility of using a Fisher discriminant analysis model based on radiomic features of DWI for predicting the clinicopathological subtypes. | The overall accuracy for predicting the clinicopathological subtypes was 96.4% by Fisher discriminant analysis, and the weighted accuracy was 96.6%.                                                                                                                               |
| <i>Saha et al</i> <sup>58</sup><br>(2018) | 922 | T1w, T1w fat sat pre contrast, T1w post contrast, DCE            | 1.5 – 3 T | MORPH, IS, texture (using spatial and no-spatial information) | --                                                                                 | Yes | To investigate the associations of MRI-based imaging phenotypes with molecular, genomic, and proliferation markers (ER, PR, HER2 and Ki67).                     | Luminal A subtype with AUC = 0.697 (95% CI: 0.647–0.746, p < .0001), triple negative breast cancer with AUC = 0.654 (95% CI: 0.589–0.727, p < .0001), ER status with AUC = 0.649 (95% CI: 0.591–0.705, p < .001), and PR status with AUC = 0.622 (95% CI: 0.569–0.674, p < .0001). |
